# Supplementary material for: Identification of a covert evolutionary pathway between two protein folds
Source: PubMed Central journal article supplement (PMC10235069; doi:10.1038/s41467-023-38519-0), 2023-06-01
Supplement: 41467_2023_38519_MOESM4_ESM.pdf [file 41467_2023_38519_MOESM4_ESM.pdf]

## **Description of Additional Supplementary Files**

### Supplementary Data 1

Description: Cross-family sequence alignments of helix-turn-helix and winged helix proteins.

### Supplementary Data 2

Description: PSI-BLAST and jackhmmer searches of C-terminal domain sequences against the Protein Data Bank.

### Supplementary Data 3

Description: Lists of Protein Data Bank entries that are homologous to response regulators with helix-turn-helix and winged helix C-terminal domains.
